# Supplementary material for: Heterogeneity assessment of functional T cell avidity
Source: PubMed Central journal article supplement (PMC5347081; doi:10.1038/srep44320), 2017-03-13
Supplement: srep44320-s1.pdf [file srep44320-s1.pdf]

## SUPPLEMENTARY INFORMATION

### Heterogeneity assessment of functional T cell avidity

Kalliopi Ioannidou, Petra Baumgaertner, Philippe O. Gannon, Michel F. Speiser, Mathilde Allard, Michael Hebeisen, Nathalie Rufer and Daniel E. Speiser

|                          |        |
|--------------------------|--------|
| Supplementary Figures    | page 1 |
| Supplementary Tables     | page 5 |
| Supplementary Methods    | page 7 |
| Supplementary References | page 9 |

#### Supplementary Figures

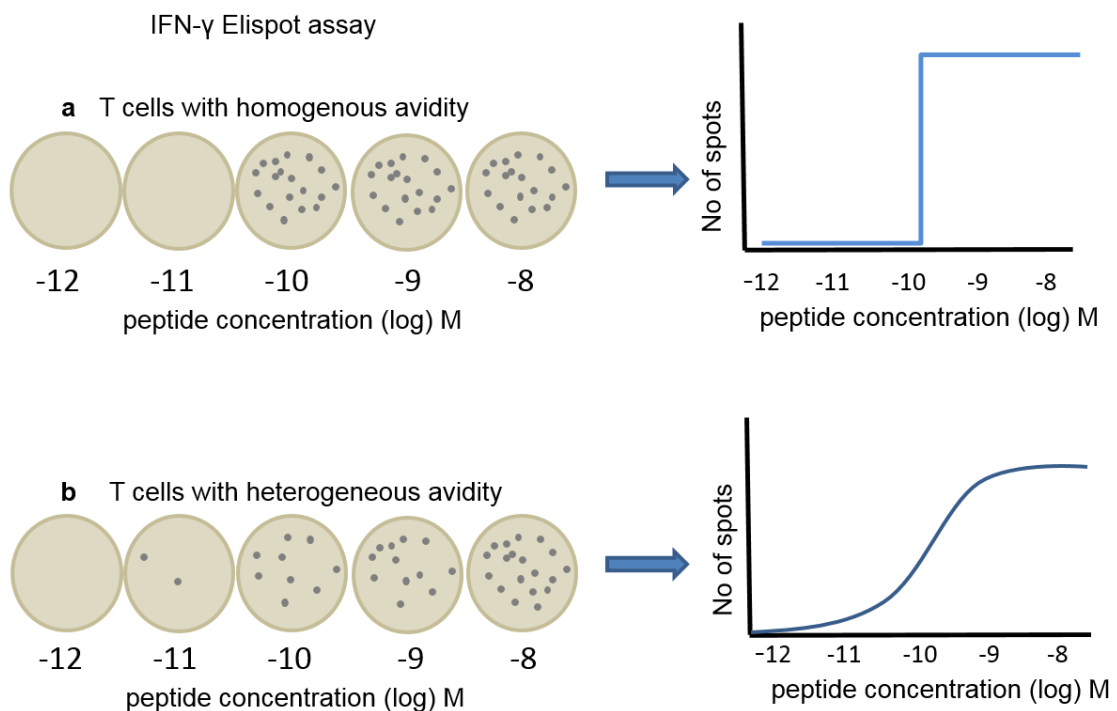

**Supplementary Figure 1 | Theoretical representation of low vs. high functional avidity heterogeneity and their hypothetical titration curves.** (a) A theoretical completely homogenous clone consisting of cells that all spot at exactly the same peptide concentration, resulting in a vertical curve. (b) The slope becomes shallower, when the cells respond with different peptide sensitivity, revealing heterogeneity.

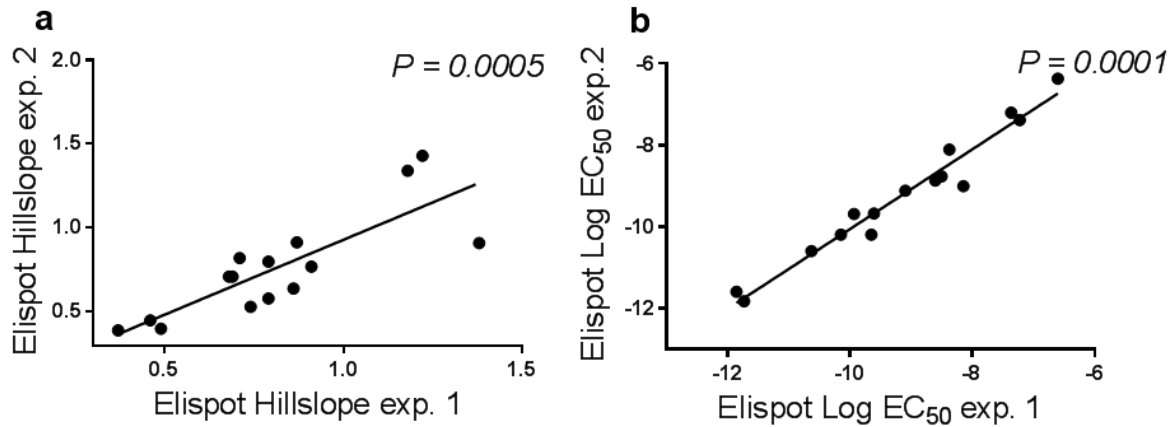

**Supplementary Figure 2** | Reproducibility of hillslope (a) and EC<sub>50</sub> (b) values obtained from 15 T cell clones, assessed by the IFN- $\gamma$  Elispot assay.

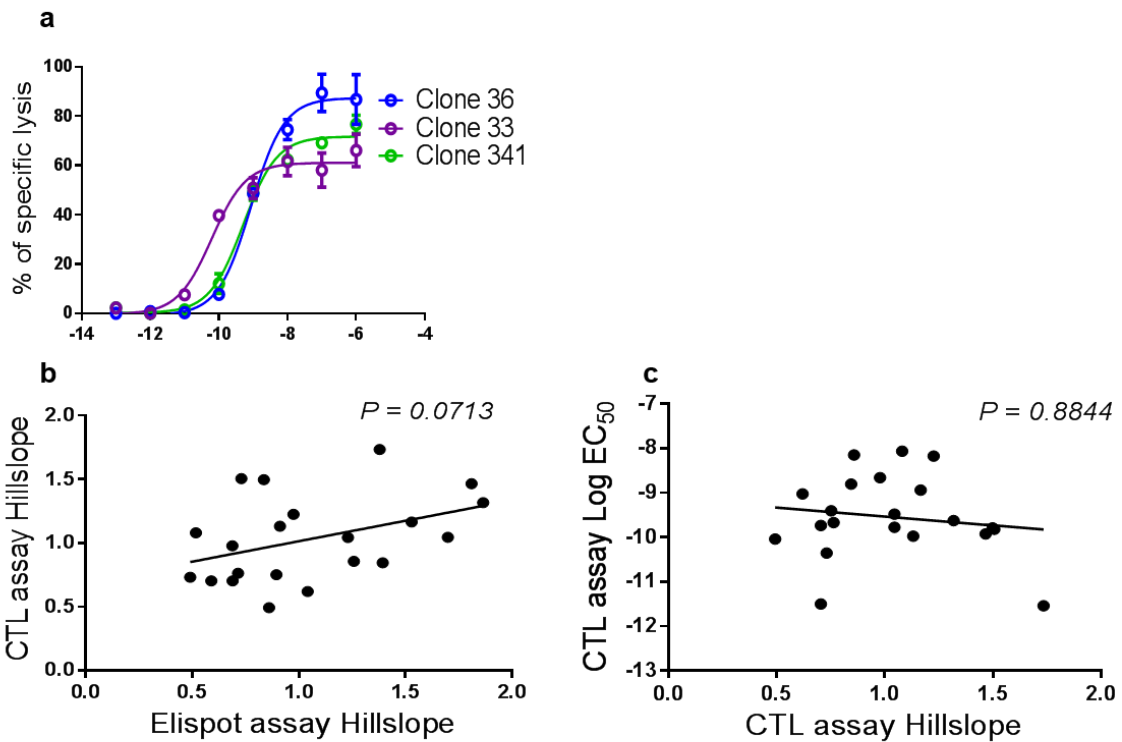

**Supplementary Figure 3** | (a) Cytotoxicity assay data from 3 different clones using the Hill function with variable slope. (b) Comparison of hillslopes assessed by the Hill function with variable slope, using the Elispot and the cytotoxicity assay. (c) EC<sub>50</sub> and hillslope using the cytotoxicity assay do not correlate.

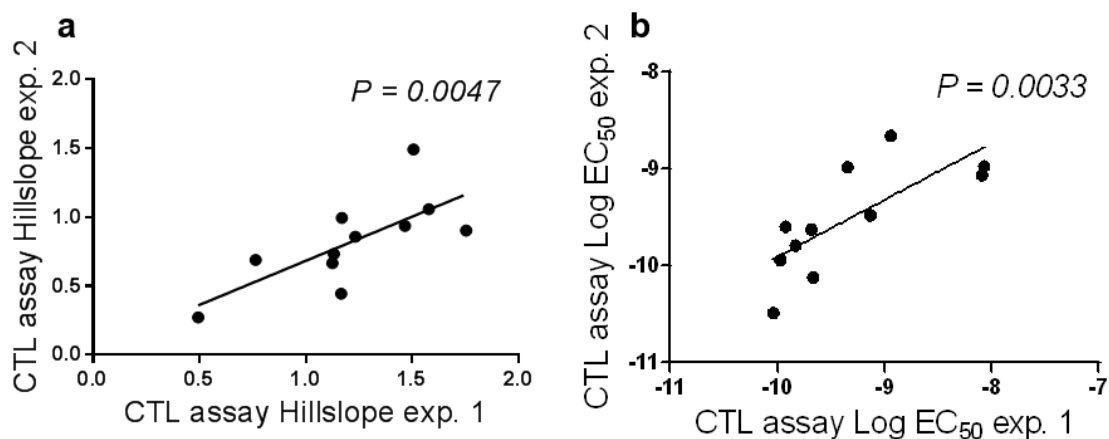

**Supplementary Figure 4** | Reproducibility of hillslope (a) and  $EC_{50}$  (b) values obtained from 11 T cell clones, assessed by the cytotoxicity assay.

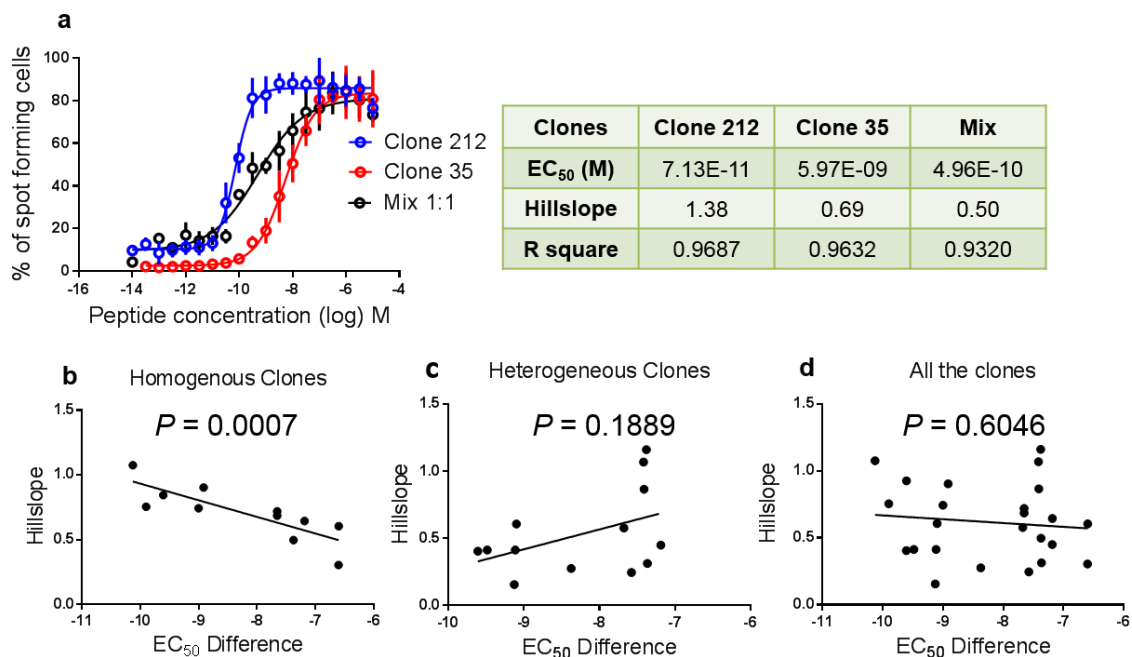

**Supplementary Figure 5** | Elispot peptide titration curves of a clone with high and a clone with low mean functional avidity, respectively, and the mixture thereof. (a) 300 cells were plated for each of the two clones (blue and red curves, respectively), and a mixture of 150 cells of the high functional avidity clone with 150 cells of the low functional avidity clone (black curve). As predicted, the black curve shows an intermediate  $EC_{50}$  value, and a lower hillslope than the ones of the two individual clones. Data are representative for 3 independent experiments. (b-d) Elispot peptide titration experiments with mixed populations of 2 homogenous or 2 heterogeneous clones, in relation to the  $EC_{50}$  differences of the two clones used for the experiment. (b) Significant correlation of the hillslope with the  $EC_{50}$  difference in experiments with 2 homogenous clones. Lack of significance when using (c) 2 heterogeneous clones, or (d) any clones (compilation of all data). All values were determined with the Elispot assay.

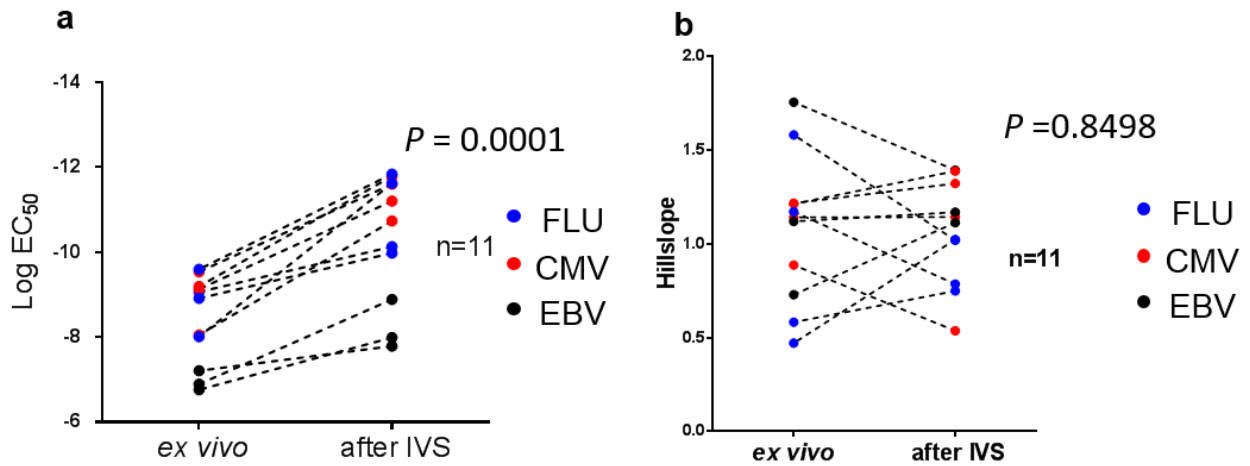

**Supplementary Figure 6 | Comparison of IFN- $\gamma$  Elispot data obtained from T cells directly assessed directly *ex vivo* versus after in vitro stimulation (IVS) for expansion during 12 days. (a) EC<sub>50</sub> values. (b) Hill slope values. Polyclonal CD8 T cell populations specific for CMV, EBV or FLU viral antigens were obtained from 11 healthy donors.**

## Supplementary Tables

| Patient (Lau) | Patient (short nr) | Clone | EC <sub>50</sub> (M) | Hillslope | R Square | Max no of spots |
|---------------|--------------------|-------|----------------------|-----------|----------|-----------------|
| 618           | 3                  | 36    | 8.06E-10             | 0.37      | 0.9390   | 148             |
| 944           | 9                  | 92    | 2.25E-10             | 0.49      | 0.9071   | 209             |
| 618           | 3                  | 312   | 7.58E-10             | 0.52      | 0.9918   | 179             |
| 975           | 20                 | 201   | 1.80E-12             | 0.59      | 0.9533   | 163             |
| 1013          | 21                 | 214   | 2.71E-10             | 0.68      | 0.9708   | 155             |
| 972           | 11                 | 111   | 2.49E-09             | 0.69      | 0.9184   | 158             |
| 618           | 3                  | 35    | 5.97E-08             | 0.69      | 0.9455   | 66              |
| 618           | 3                  | 32    | 3.15E-09             | 0.71      | 0.9697   | 160             |
| 371           | 5                  | 51    | 1.17E-10             | 0.73      | 0.9315   | 110             |
| 1013          | 21                 | 211   | 1.86E-12             | 0.79      | 0.9428   | 238             |
| 944           | 9                  | 91    | 1.40E-12             | 0.79      | 0.9093   | 197             |
| 618           | 3                  | 34    | 2.35E-11             | 0.86      | 0.9006   | 196             |
| 944           | 9                  | 94    | 4.32E-08             | 0.87      | 0.9768   | 127             |
| 618           | 3                  | 319   | 3.94E-11             | 0.89      | 0.8397   | 176             |
| 618           | 3                  | 317   | 2.24E-11             | 0.91      | 0.7184   | 198             |
| 371           | 5                  | 52    | 2.51E-07             | 0.91      | 0.9828   | 139             |
| 618           | 3                  | 316   | 6.02E-10             | 0.97      | 0.9780   | 144             |
| 618           | 3                  | 314   | 1.33E-12             | 1.04      | 0.9123   | 154             |
| 618           | 3                  | 340   | 4.43E-10             | 1.15      | 0.9838   | 173             |
| 1013          | 21                 | 213   | 4.23E-09             | 1.18      | 0.9651   | 233             |
| 618           | 3                  | 343   | 7.35E-10             | 1.20      | 0.9545   | 196             |
| 944           | 9                  | 93    | 2.48E-10             | 1.22      | 0.9840   | 185             |
| 618           | 3                  | 33    | 1.33E-09             | 1.23      | 0.9643   | 297             |
| 618           | 3                  | 37    | 8.78E-11             | 1.24      | 0.9851   | 341             |
| 618           | 3                  | 347   | 7.42E-10             | 1.26      | 0.9702   | 154             |
| 1013          | 21                 | 212   | 7.13E-11             | 1.38      | 0.9687   | 289             |
| 618           | 3                  | 311   | 3.06E-09             | 1.39      | 0.8974   | 176             |
| 618           | 3                  | 344   | 1.54E-09             | 1.42      | 0.9881   | 175             |
| 618           | 3                  | 346   | 3.49E-10             | 1.53      | 0.9713   | 206             |
| 618           | 3                  | 310   | 2.28E-11             | 1.70      | 0.9805   | 167             |
| 618           | 3                  | 342   | 1.84E-10             | 1.81      | 0.9672   | 221             |
| 618           | 3                  | 341   | 1.39E-10             | 1.86      | 0.9747   | 223             |

**Supplementary Table 1 | Overview of all T cell clones tested by the IFN- $\gamma$  Elispot assay.** EC<sub>50</sub>, Hillslope, R square (as a measure of the goodness of curve fit) and maximal numbers of spots were determined by Elispot assays as described in Methods.

| Patient (Lau) | No. of vaccinations | % t ELA+ ex vivo | % t ELA+ in vitro | EC <sub>50</sub> (M) | Hillslope | R square | Days after IVS | Max no of spots |
|---------------|---------------------|------------------|-------------------|----------------------|-----------|----------|----------------|-----------------|
| 444           | 20                  | 0.68             | 17.7              | 7.37E-13             | 0.30      | 0.7430   | 12             | 186             |
| 1013          | 8                   | 0.81             | N/A               | 3.90E-10             | 0.46      | 0.9145   | 15             | 222             |
| 706           | 4                   | 0.13             | 4.45              | 1.77E-07             | 0.52      | 0.6262   | 15             | 120             |
| 1264          | 22                  | 0.68             | 12.3              | 4.97E-11             | 0.53      | 0.9072   | 12             | 102             |
| 1090          | 16                  | 0.06             | 36.8              | 5.16E-11             | 0.68      | 0.7153   | 11             | 54              |
| 618           | 20                  | 0.9              | 13.6              | 2.06E-09             | 0.69      | 0.9335   | 13             | 206             |
| 1106          | 25                  | 0.75             | 42.5              | 1.38E-09             | 0.71      | 0.9591   | 14             | 121             |
| 392           | 7                   | 0.36             | 22.6              | 1.75E-10             | 0.85      | 0.9422   | 12             | 342             |
| 1022          | 8                   | 0.32             | 9.37              | 2.49E-10             | 0.88      | 0.9334   | 12             | 330             |
| 1164          | 10                  | 3.48             | 55.4              | 1.03E-10             | 1.02      | 0.9222   | 11             | 328             |
| 944           | 16                  | 1.43             | 58                | 2.48E-10             | 1.14      | 0.9802   | 14             | 120             |
| 972           | 20                  | 3.48             | 79.7              | 2.29E-11             | 1.68      | 0.9667   | 12             | 140             |
| 672           | 4                   | 0.12             | 19.3              | 4.87E-11             | 1.76      | 0.9869   | 12             | 375             |
| 648           | 12                  | 0.17             | 17.8              | 1.33E-11             | 1.80      | 0.8202   | 11             | 100             |

**Supplementary Table 2|Analysis of total polyclonal HLA-A2/Melan-A specific T cell populations.** No of vaccinations, number of monthly vaccinations with Melan-A peptide, CpG 7909 and IFA that the patients had received before taking blood for T cell analysis. Frequencies of A2/Melan-A tetramer+ (t ELA+) cells before (*in vivo*) and after *in vitro* stimulation (IVS) for 12 days, determined by flow cytometry with fluorescent tetramers. EC<sub>50</sub>, Hillslope, R square and maximal numbers of spots were determined by Elispot assays as described in Methods.

## **Supplementary Methods**

**Blood withdrawal.** Blood samples were taken one week after vaccination. Lymphoprep™ (Fresenius Kabi Norge AS, 12HGS05) centrifuged PBMCs were cryopreserved in RPMI 1640, 40% FCS, and 10% DMSO at a concentration of  $10 \times 10^6$  PBMCs per ml for 72 h at  $-80^\circ\text{C}$  and then transferred into the vapor phase of liquid nitrogen until further use.

**Purification of CD8 T cells.**  $10 \times 10^6$  PBMCs were thawed, washed, and resuspended with 80  $\mu\text{l}$  cell sorting buffer (PBS, 0.2 % BSA, 5  $\mu\text{M}$  EDTA), kept on ice. 20  $\mu\text{l}$  of CD8 microbeads (Miltenyi, 130-045-201) were added, mixed and incubated for 30 min (mixing every 10 min) in the fridge. Cells were washed by adding 2 ml of cell sorting buffer, centrifuged at 1500 rpm for 5 minutes and resuspended in 500  $\mu\text{l}$  of cell sorting buffer. MS columns (Miltenyi) were loaded with a maximal number of  $10^7$  labeled cells or  $2 \times 10^8$  total cells. 15 ml Falcon tubes were labeled as CD8- and placed below the columns to collect the flow-through of unlabeled CD8- cells. The columns were rinsed once with 500  $\mu\text{l}$  of cell sorting buffer, before the addition of the cell suspension. The volume passed through entirely and the column was washed three times by adding 500  $\mu\text{l}$  of cell sorting buffer. The columns were removed from the separators and placed onto Falcon tubes. 2 ml of cell sorting buffer was added to the columns and the plunger was pushed firmly into the columns to flush the positive-labeled cells. The CD8- and the CD8+ cells fractions were centrifuged and washed after with 2 ml RPMI medium supplemented with 8% Human Serum to determine the cell number.

**Expansion of CD8 T cell clones.** Upon expansion, the specificity of each generated T cell clone was verified by multimer staining. T cell clones were expanded by periodic (every 14–21 d) restimulation with PHA, human IL-2, and irradiated feeder cells. Monoclonality was confirmed for the majority of the clones used in this study, by sequencing of TCR- $\alpha$  and - $\beta$  chains, and by FACS staining with V $\beta$  specific antibodies (data not shown).

***In vitro* stimulation (IVS) of purified CD8 T cells with peptide for expansion of the antigen specific T cells.** Because the available blood volume and cell numbers from melanoma patients were low, we first expanded them by *in vitro* stimulation (IVS) for 12-14 days. The CD8- fraction was irradiated with a dose of 30 Grays and resuspended with fresh RPMI + 8% Human Serum. Melan-A analog peptide (ELAGIGILTV, stock 1mg/ml), Cytomegalovirus peptide (CMV; NLVPMVATV, stock 1mg/ml), Epstein–Barr virus peptide (EBV; GLCTLVAML, stock 1mg/ml), and Influenza virus peptide (FLU; GILGFVFTL, stock 1mg/ml), were added respectively, at the final concentration of 1  $\mu\text{M}$ . CD8 T cells were added and incubated at  $37^\circ\text{C}$ . After 24 hours, IL-2 was added, starting with 50 U/ml, and increased to 100 U/ml on the second day, and from the next day on, with 150 U/ml. The culture medium was changed twice per week. After 12-14 days, the antigen specificity was determined by tetramer FACS staining, and cultures were used for Elispot assays. We studied the impact of *in vitro* stimulation (IVS) on the functional avidity and heterogeneity of the expanded cells, in comparison to direct *ex vivo* analysis. Analyzing 11 healthy donors with different specificities for CMV, EBV and FLU virus we found that the  $\text{EC}_{50}$  values in all cases were significantly increased (**Supplementary Fig. 6a**). Therefore, IVS increased the functional avidity of the expanded cells, likely through enhanced activation and co-receptor activity<sup>1-3</sup>. In contrast, the hillslope values stayed similar or changed to variable degrees, such that the difference between direct *ex vivo* analysis and after IVS was not statistically significant (**Supplementary Fig. 6b**), with some populations showing increased and others

decreased hillslopes after IVS. Overall, IVS clearly impacted on the T cell's avidity, suggesting that future studies should preferably be done directly *ex vivo*, albeit this requires large blood volumes.

**Chromium release cytotoxicity assay.** Chromium release assays were performed using radioactive  $^{51}\text{Cr}$ . For peptide titration experiments,  $^{51}\text{Cr}$ -labeled TAP2/2-deficient T2 cells (HLA-A\*0201+) were pulsed with serial dilutions from  $10^{-6}$  M to  $10^{-13}$  M of Melan-A EAAGIGILTV peptide. The effector cell to target cell (E:T) ratio was 10:1. After 4 hours incubation, supernatants were analyzed in a TopCount NXT benchtop microplate scintillation and luminescence counter. The percentage of specific lysis was calculated as  $100 \times (\text{experimental} - \text{spontaneous release}) / (\text{total} - \text{spontaneous release})$ . The cytotoxicity assays were performed three times.

**IFN- $\gamma$  Elispot assay.** 25  $\mu\text{l}$  of 35% ethanol/well was put in 96 well PVDF plates (MSIPS4510, Millipore) and incubated at room temperature (RT) for 30 seconds. The wells were emptied by flicking the plate over a sink and gently tapping on absorbent paper. The plates were thoroughly washed 3x with 100  $\mu\text{l}$  1X PBS per well. 100  $\mu\text{l}$  of diluted capture antibody (100  $\mu\text{l}$  into 10 ml 1X PBS) was added to every well and the plates were covered and incubated at 4°C overnight. The wells were washed as previously, once with 100  $\mu\text{l}$  1X PBS. 100  $\mu\text{l}$  of culture medium with 10% serum was added to every well and the plates were incubated at RT for 2 hours. The wells were washed with 100  $\mu\text{l}$  1X PBS, and 300 antigen specific CD8 T cells in 50  $\mu\text{l}$  of RPMI with 8% Human serum were plated with 50  $\mu\text{l}$  of 20'000 T2 cells per well and the addition of 1  $\mu\text{M}$  of the native Melan A peptide (EAA, stock 1mg/ml), in a total volume of 200  $\mu\text{l}$  per well. The plates were incubated at 37°C in a CO<sub>2</sub> incubator for 20 hours. With the aim to always plate 300 antigen specific T cells per well, the polyclonal T cell populations were first characterized with fluorescent tetramers by flow cytometry, and the numbers of cells were adjusted according to the percent of tetramer-positive T cells. The next day the plates were incubated with 100  $\mu\text{l}$  of 0.05% PBS-Tween solution (wash buffer) per well at 4°C for 10 min and subsequently 3x with wash buffer. 100  $\mu\text{l}$  of diluted detection antibody (100  $\mu\text{l}$  into 10 ml Dilution buffer) was added to every well and incubated at RT for 1 hour 30 min. The plates were washed 3x with 100  $\mu\text{l}$  of wash buffer and 100  $\mu\text{l}$  of diluted Streptavidin –AP conjugate was added to every well. After an incubation of 1 hour at RT, the plates were washed 3x with wash buffer and 3x with distilled water (both sides of the membrane, peeling off the plate bottom). 100  $\mu\text{l}$  of BCIP/NBT buffer was added to every well and the plates were incubated for 5-15 min, monitoring spot formation visually throughout the incubation to assess sufficient color development. The wells were emptied and both sides of the membrane were rinsed 3x with distilled water. The frequency of the resulting colored spots corresponding to the cytokine producing cells, was determined using the Elispot Bioreader 5000. All Elispot experiments were performed in triplicates. For clones, the experiments were performed 2-3 times. The total polyclonal populations were only tested once because of the limited cell availability. The standard deviations from the triplicate Elispot cultures (**Figure 5a-f**) were relatively small. Furthermore, we always tested a clone of a well-known functional avidity as a control in parallel to the patients' polyclonal populations, and only used the results from those experiments in which the controls showed proper reproducibility.



### **Supplementary References**

- 1 Goff, S. L. *et al.* Enhanced receptor expression and in vitro effector function of a murine-human hybrid MART-1-reactive T cell receptor following a rapid expansion. *Cancer Immunol. Immunother.* **59**, 1551-1560 (2010).
- 2 Lee, K. H. *et al.* Increased vaccine-specific T cell frequency after peptide-based vaccination correlates with increased susceptibility to in vitro stimulation but does not lead to tumor regression. *J. Immunol.* **163**, 6292-6300 (1999).
- 3 Montes, M. *et al.* Optimum in vitro expansion of human antigen-specific CD8 T cells for adoptive transfer therapy. *Clin. Exp. Immunol.* **142**, 292-302 (2005).
